1                   **The genetic basis of diurnal preference in *Drosophila melanogaster***

2   Mirko Pegoraro<sup>1,4</sup>, Laura M.M. Flavell<sup>1</sup>, Pamela Menegazzi<sup>2</sup>, Perrine Columbine<sup>1</sup>, Pauline  
3   Dao<sup>1</sup>, Charlotte Helfrich-Förster<sup>2</sup> and Eran Tauber<sup>1,3</sup>

4

5       1. Department of Genetics, University of Leicester, University Road, Leicester, LE1 7RH, UK

6       2. Neurobiology and Genetics, Biocenter, University of Würzburg, Germany

7       3. Department of Evolutionary and Environmental Biology, and Institute of Evolution,  
8       University of Haifa, Haifa 3498838, Israel

9       4. School of Natural Science and Psychology, Liverpool John Moores University, L3 3AF, UK

10

11

12   Corresponding author: E. Tauber, Department of Evolutionary and Environmental Biology,  
13   and Institute of Evolution, University of Haifa, Haifa 3498838, Israel; Tel:+97248288784  
14   Email: etauber@univ.haifa.ac.il

15

16

17       *Classification:* Biological Sciences (Genetics)

18

19

20   Keywords: Artificial selection, circadian clock, diurnal preference, nocturnality,

21       *Drosophila*

22

23

24

## 25 **Abstract**

26 Most animals restrict their activity to a specific part of the day, being diurnal, nocturnal or  
27 crepuscular. The genetic basis underlying diurnal preference is largely unknown. Under  
28 laboratory conditions, *Drosophila melanogaster* is crepuscular, showing a bi-modal activity  
29 profile. However, a survey of strains derived from wild populations indicated that high  
30 variability among individuals exists, with diurnal and nocturnal flies being observed. Using a  
31 highly diverse population, we have carried out an artificial selection experiment, selecting  
32 flies with extreme diurnal or nocturnal preference. After 10 generations, we obtained highly  
33 diurnal and nocturnal strains. We used whole-genome expression analysis to identify  
34 differentially expressed genes in diurnal, nocturnal and crepuscular (control) flies. Other than  
35 one circadian clock gene (*pdp1*), most differentially expressed genes were associated with  
36 either clock output (*pdf*, *to*) or input (*Rh3*, *Rh2*, *msn*). This finding was congruent with  
37 behavioural experiments indicating that both light masking and the circadian pacemaker are  
38 involved in driving nocturnality. The diurnal and nocturnal selection strains provide us with a  
39 unique opportunity to understand the genetic architecture of diurnal preference.

40

41

42

## 43 **Significance**

44 Most animals are active during specific times of the day, being either diurnal or nocturnal.

45 Although it is clear that diurnal preference is hardwired into a species' genes, the genetic  
46 basis underlying this trait is largely unknown. While laboratory strains of *Drosophila* usually  
47 exhibit a bi-modal activity pattern (i.e., peaks at dawn and dusk), we found that strains from  
48 wild populations exhibit a broad range of phase preferences, including diurnal and nocturnal  
49 flies. Using artificial selection, we have generated diurnal and nocturnal strains that allowed  
50 us to test the role of the circadian clock in driving nocturnality, and to search for the genes  
51 that are associated with diurnal preference.

52

53

## 54 **Introduction**

55 Although time is one of the most important dimensions that define the species ecological  
56 niche, it is often a neglected research area (1). Most animal species exhibit locomotor activity  
57 that is restricted to a defined part of the day, and this preference constitutes the species-  
58 specific *temporal niche*. Selection for activity during a specific time of the day may be driven  
59 by various factors, including preferred temperature or light intensity, food availability and  
60 predation. The genetic basis for such phase preference is largely unknown and is the focus of  
61 this study.

62 The fact that within phylogenetic groups, diurnality preference is usually similar (2)  
63 alludes to an underlying genetic mechanism. The nocturnality of mammals, for example, was  
64 explained by the nocturnal bottleneck hypothesis (2), which suggested that all mammals  
65 descended from a nocturnal ancestor. Nocturnality and diurnality most likely evolved through  
66 different physiological and molecular adaptations (3). Two plausible systems that have been  
67 targetted for genetic adaptations driven by diurnal preference are the visual system and the  
68 circadian clock, the endogenous pacemaker that drives daily rhythms. The visual system of  
69 most mammals is dominated by rods, yet is missing several cone photoreceptors that are  
70 present in other taxa where a nocturnal lifestyle is maintained (4).

71 Accumulating evidence suggests that diurnal preference within a species is far more  
72 diverse than previously thought. Laboratory studies (1) have often focused on a single  
73 representative wild-type strain and ignored the population and individual diversity within a  
74 species. In addition, experimental conditions in the laboratory setting (particularly light and  
75 temperature) often fail to simulate the high complexity that exists in natural conditions (1).  
76 Furthermore, many species shift their phase preference upon changes in environmental  
77 conditions. Such “temporal niche switching” is undoubtedly associated with considerable  
78 plasticity that may lead to rapid changes in behaviour. For example, the spiny mouse (*Acomys*

79 *cahirinus*) and the golden spiny mouse (*A. russatus*) are two desert sympatric species that  
80 split their habitat: the common spiny mouse is nocturnal, whereas the golden spiny mouse is  
81 diurnal. However, in experiments where the golden spiny mouse is the only species present,  
82 the mice immediately reverted to nocturnal behaviour (5).

83 While plasticity plays an important role in diurnal preference, there is some evidence  
84 for a strong genetic component underlying the variability seen among individuals. For  
85 instance, twin studies (6) found higher correlation of diurnal preference in monozygotic twins  
86 than in dizygotic twins, with the estimated heritability being as high as 40%. In addition, a  
87 few studies in humans have reported a significant association between polymorphisms in  
88 circadian clock genes and ‘morningness–eveningness’ chronotypes, including a  
89 polymorphism in the promoter region of the *period3* gene (7).

90 *Drosophila melanogaster* is considered a crepuscular species that exhibits a bimodal  
91 locomotor activity profile (in the laboratory), with peaks of activity arising just before dawn  
92 and dusk. This pattern is highly plastic and the flies promptly respond to changes in day-  
93 length or temperature simulating winter or summer. It has been shown that rises in  
94 temperature or irradiance during the day drives the flies to nocturnality, whereas low  
95 temperatures or irradiances result in a shift to more prominent diurnal behaviour (8, 9). Such  
96 plasticity was also demonstrated in studies showing that flies switch to nocturnality under  
97 moon light (10, 11) or in the presence of other socially interacting flies (12).

98 Some evidence also alludes to the genetic component of phase preference in  
99 *Drosophila*. Sequence divergence in the *period* gene underlies the phase difference seen in  
100 locomotor and sexual rhythms between *D. melanogaster* and *D. pseudoobscura* (13). Flies  
101 also show natural variation in the timing of adult emergence (eclosion), with a robust  
102 response to artificial selection for the early and late eclosion phases having been shown,  
103 indicating that substantial genetic variation underlies this trait (14).

104 Further support for a genetic component to phase preference comes from our previous  
105 studies of allelic variation in the circadian-dedicated photoreceptor *cryptochrome* (CRY),  
106 where an association between a pervasive replacement SNP (L232H) and the phases of  
107 locomotor activity and eclosion was revealed (15). Studies of null mutants of the *Clock* gene  
108 (*Clk<sup>rk</sup>*) revealed that such flies became preferentially nocturnal (16), and that this phase  
109 switch is mediated by elevated CRY in a specific subset of clock neurons (17). In other  
110 experiments, mis-expression of *Clk* resulted in light pulses evoking longer bouts of activity,  
111 suggesting that *Clk* plays a clock-independent role that modulates the effect of light on  
112 locomotion (18).

113 Here, using 272 natural population strains from 33 regions in Europe and Africa, we  
114 have generated a highly diverse population whose progeny exhibited a broad range of phase  
115 preferences, with both diurnal and nocturnal flies being counted. We exploited this  
116 phenotypic variability to study the genetic architecture of diurnal preference and identify loci  
117 important for this trait using artificial selection, selecting for diurnal and nocturnal flies.

118  
119

## 120 **Results**

### 121 *Artificial selection for diurnal preference*

122 Flies showed a rapid and robust response to selection for phase preference. After 10 selection  
123 cycles, we obtained highly diurnal (D) and nocturnal (N) strains. The two control strains (C)  
124 showed intermediate (crepuscular) behaviour (Fig. 1). To quantify diurnal preference, we  
125 defined the ND ratio, quantitatively comparing activity during a 12 h dark period and during  
126 a 12 h light period. As early as after one cycle of selection, the ND ratios of N and D flies,  
127 and as compared to the original (control) population, were significantly different (Fig. 1A,

128 B). After 10 generation of selection, the N and D populations were highly divergent (Fig. 1B,  
129 SI Appendix, Table S1).

130 The estimated heritability  $h^2$  was higher for diurnality (37.1%) than for nocturnality,  
131 (8.4%) reflecting the asymmetric response of the two populations (SI Appendix, Table S1).  
132 We estimated heritability by parents-offspring regression (Fig. 1C, D). The narrow-sense  
133 heritability was lower but significant ( $h^2 = 14\%$   $p < 0.05$ ; Fig. 1C). The heritability value was  
134 slightly higher when ND ratios of mothers and daughters were regressed ( $h^2 = 16\%$   $p < 0.05$ ;  
135 Fig. 1D) but was minute and insignificant in the case of father-son regression (SI Appendix,  
136 Fig. S1;  $h^2 = 2.5\%$  NS).

137

### 138 *Effects of Nocturnal/Diurnal phenotypes on fitness*

139 A possible mechanism driving the observed asymmetric response to selection is unequal  
140 allele frequencies, whereby a slower response to selection is associated with increased fitness  
141 (19). We, therefore, tested whether our selection protocol asymmetrically affected the fitness  
142 of the N and D populations. After ~15 overlapping generations (5 months in a 12h:12h  
143 light:dark (LD) ) from the end of the selection, we tested viability, fitness and egg-to-adult  
144 developmental time of the selection and control populations. While the survivorship of males  
145 from the three populations was similar ( $\chi^2 = 1.6$ ,  $df = 2$ ,  $p = 0.46$ ; Fig. 2A), we found significant  
146 differences in females. N females lived significantly longer than D females, while C females  
147 showed intermediate values ( $\chi^2 = 7.6$ ,  $df = 2$ ,  $p < 0.05$ ; Fig. 2A). The progeny number of N  
148 females was larger than that of D females, with C females showing intermediate values  
149 ( $\sigma^2 F_{1,18} = 5.12$ ,  $p < 0.05$ ;  $\phi^2 F_{1,18} = 5.09$ ,  $p < 0.05$ ; Fig. 2B). Developmental time (egg-to-adult),  
150 another determinant of fitness, did not differ significantly between the nocturnal/diurnal  
151 populations ( $\sigma^2 F_{2,27} = 0.43$ ,  $p = 0.65$ , NS;  $\phi^2 F_{2,27} = 0.27$ ,  $p = 0.76$ , NS; Fig. 2C,D).

152

153 ***Effects on circadian behaviour***

154 Since the circadian system is a conceivable target for genetic adaptations that underlie diurnal  
155 preference, we tested whether the circadian clock of the N and D strains were affected by the  
156 Nocturnal/Diurnal artificial selection. Accordingly, we recorded the locomotor activity of the  
157 selection lines following three generations after completion of the selection protocol, and  
158 measured various parameters of circadian rhythmicity.

159 The phase of activity peak in the morning (MP) and in the evening (EP) differed  
160 between the populations (SI Appendix, Fig. S2A). As expected, the MP of the N population  
161 was significantly advanced, as compared to that seen in both the C and D populations. The  
162 EP of the N population was significantly delayed, as compared to that noted in the two other  
163 populations. Concomitantly, the sleep pattern was also altered (SI Appendix, S2B), with N  
164 flies sleeping much more during the day than did the other populations. While the D flies  
165 slept significantly more than C and N flies during the night, there was no difference between  
166 N and C flies.

167 In contrast to the striking differences seen between the selection lines in LD  
168 conditions, such differences were reduced in DD conditions (Fig. 3, SI Appendix, Fig. S2C).  
169 The period of the free-run of activity (FRP) was longer in the C flies than in D flies, while the  
170 difference between the D and N groups was only marginally significant (Fig. 3A). No  
171 significant difference in FRP was found between N and C flies. The phases ( $\phi$ ) of the three  
172 populations did not differ significantly (Fig. 3B). We also tested the response of the flies to  
173 an early night (ZT15) light stimulus and found no significant differences between the delay  
174 responses (Fig. 3C).

175

176 ***Circadian differences between Nocturnal/Diurnal isogenic strains***

177 To facilitate genetic dissection of the nocturnal/diurnal preference, we generated nocturnal,  
178 diurnal and control isogenic strains (D\*, N\* and C\*; one of each) from the selected  
179 populations. The strains were generated using a crossing scheme involving strains carrying  
180 balancer chromosomes. The ND ratios of the isogenic lines resembled those of the progenitor  
181 selection lines (SI Appendix, Fig. S3A).

182 The circadian behaviour of the isogenic lines differed, with the N\* line having a  
183 longer FRP than both the D\* and C\* lines (Fig. 4A). The locomotory acrophase of the N\*  
184 line was delayed by about 2 h, as compared to the D\* line, and by 1.38 h, as compared to the  
185 C\* line ( $F_{2,342}:6.01$ ,  $p<0.01$ ; Fig. 4B). In contrast, circadian photosensitivity seemed to be  
186 similar among the lines, as their phase responses to a light pulse at ZT15 did not differ  
187 ( $F_{2,359}:1.93$ ,  $p:0.15$ , NS; Fig. 4D). Since eclosion is regulated by the circadian clock (20, 21),  
188 we also compared the eclosion phase of the isogenic strains. Under LD, the eclosion phase of  
189 D\* flies was delayed by ~2 h, as compared to both N\* and C\* flies, whereas s no difference  
190 between N\* and C\* flies was detected (Fig. 4C).

191 The isogenic strains also differed in terms of their sleep pattern (SI Appendix, Fig.  
192 S3B). N\* flies slept 4 h more than did D\* flies during the day and ~2.5 h more than did C\*  
193 flies ( $F_{11,1468} = 61.32$ ,  $p<0.0001$ ). During the night, the pattern was reversed, with D\* flies  
194 sleeping almost 5 h more than N\* flies and about 2 h more than C\* flies ( $F_{11,1472} = 104.70$ ,  
195  $p<0.0001$ ).

196

197 ***Diurnal preference is partly driven by masking***

198 We reasoned that light masking (i.e., the clock-independent inhibitory or stimulatory effect of  
199 light on behaviour) could be instrumental in driving diurnal preference. We thus monitored  
200 fly behaviour in DD to assess the impact of light masking. We noticed that when N\* flies



201 were released in DD, their nocturnal activity was much reduced, whereas their activity during  
202 the subjective day increased (Fig. 5A). Indeed, the behaviour of N\* and D\* flies in DD  
203 became quite similar (Fig. 5A). Congruently, when we analysed the ND ratios of these flies  
204 in LD and DD, we found that that both N\* and C\* flies became significantly more “diurnal”  
205 when released into constant conditions (N\*,  $p < 0.0001$ ; C\*,  $p < 0.001$ ). In contrast, the ratios of  
206 D\* flies did not significantly change in DD ( $p = 0.94$ , NS). This result suggests that nocturnal  
207 behaviour is at least partially driven by a light-dependent repression of activity (i.e., a light  
208 masking effect).

209

### 210 *Correlates of the molecular clock*

211 To investigate whether differences in diurnal preference correlated with a similar shift in the  
212 molecular clock, we measured the intensity of nuclear PERIOD (PER) in key clock neurons  
213 (Fig 6). The peak of PER signals in ventral neurons (LNv: 5<sup>th</sup>-sLNv, sLNv, ILNv) was  
214 delayed in N\* flies, as compared to the timing of such signals in D\* fly 5<sup>th</sup>-sLNv, sLNv and  
215 ILNv neurons. In N\* and D\* flies, the phases of such peaks in dorsal neurons (DN, including  
216 the clusters LN<sub>d</sub>, DN<sub>1</sub> and DN<sub>2</sub>) were similar (Fig 6).

217 We also measured the expression of the Pigment Dispersing Factor (PDF) in LNv  
218 projections (Fig. 7, SI Appendix, Fig. S4). The signal measured in N\* flies was lower than  
219 that measured in D\* flies during the first part of the day (in particular at ZT3 and ZT7) yet  
220 increased during the day-night transition at ZT11 and ZT13. There were no differences seen  
221 during the rest of the night.

222

### 223 *Global transcriptional differences between Nocturnal/Diurnal strains*

224 To gain insight into the genetics of diurnal preference, we profiled gene expression in fly  
225 heads of individuals from the D\*, C\* and N\* isogenic lines by RNAseq. We tested for

226 differentially expressed genes (DEG) in all pairwise contrasts among the three strains at two  
227 time points. We found 34 DEGs at both ZT0 and ZT12 (SI Appendix, Table S3). An  
228 additional 19 DEG were unique to ZT0 and 87 DEG were unique to ZT12 (SI Appendix,  
229 Table S3). Functional annotation analysis (DAVID, <https://david.ncifcrf.gov/> (22, 23))  
230 revealed similarly enriched categories at ZT0 and ZT12 (Fig. 8). The predicted products of  
231 the DEGs were largely assigned to extracellular regions and presented secretory pathway  
232 signal peptides. DEG products identified only at ZT12 were related to the immune response,  
233 amidation and kinase activity. Given the intermediate phenotype exhibited by C\* flies, we  
234 reanalysed the data, searching for DEGs where C\* flies showed intermediate expression ( $D^*$   
235  $> C^* > N^*$  or  $N^* > C^* > D^*$ ; SI Appendix, Table S4). The list of DEGs consisted of 22 genes  
236 at ZT0 and 62 at ZT12. Amongst the different functions represented by these new lists were  
237 photoreception, circadian rhythm, sleep, Oxidation-reduction and mating behaviour were  
238 over-represented in both D\* and N\* flies. For example, *Rhodopsin 3 (Rh3)* was up-regulated  
239 in D\* flies, while *Rh2* and *Photoreceptor dehydrogenase (Pdh)* were down-regulated in N\*  
240 flies. *pastrel (pst)*, a gene involved in learning and memory, was up-regulated in D\* flies,  
241 while genes involved in the immune response were up-regulated in N\* flies. The only core  
242 clock gene that showed differential expression was *Par Domain Protein 1 (Pdp1)*, which was  
243 up-regulated in D\* flies. The clock output genes *takeout (to)* and *pdf* were up-regulated in N\*  
244 flies. Overall, the results suggested that genes that are transcriptionally associated with  
245 diurnal preference are mostly found upstream (light input pathways), and downstream of  
246 genes comprising the circadian clock.

247

### 248 ***Complementation test***

249 We investigated the contribution of various genes to nocturnal/diurnal behaviour using a  
250 modified version of the quantitative complementation test (QCT) (24). We tested the core

251 circadian clock genes *per* and *Clk*, the circadian photoreceptor *cry* and the output gene *Pdf*  
252 and *Pdfr*, encoding its receptor (Fig. 9, SI Appendix, Table S5) (25). We also tested the ion  
253 channel-encoding *narrow abdomen* (*na*) gene, given its role in the circadian response to light  
254 and dark-light transition (26). The QCT revealed significant allele differences in *per*, *Pdf*,  
255 *Pdfr*, *cry* and *na* (Fig. 9, SI Appendix, Table S5), indicative of genetic variability in these  
256 genes contributing to the nocturnal/diurnal behaviour of the isogenic lines.

257         Since switching from nocturnal to diurnal behaviour in mice has been shown to be  
258 associated with metabolic regulation (27, 28), we also tested *Insulin-like peptide 6* (*Ilp6*), and  
259 *chico*, both of which are involved in the *Drosophila* insulin pathway. A significant effect was  
260 found in *Ilp6* but not in *chico* (SI Appendix, S5). Other genes that failed to complement were  
261 *paralytic* (*para*), encoding a sodium channel, and *coracle* (*cora*), involved in embryonic  
262 morphogenesis (29-31).

263         We also tested genes that could affect the light input pathway, such as *Arrestin2*  
264 (*Arr2*) and *misshapen* (*msn*) (32, 33). There was a significant evidence for *msn* failing to  
265 complement but not for *Arr2* (SI Appendix, Table S5). Various biological processes are  
266 associated with *msn*, including glucose metabolism, as suggested by a recent study (34).

267

268

## 269 **Discussion**

270 In this study, we used artificial selection to generate two highly divergent populations that  
271 respectively show diurnal and nocturnal activity profiles. The response to selection was  
272 asymmetrical, as reflected by heritability  $h^2$ , which was higher for diurnality (37.1%) than for  
273 nocturnality (8.4%). This may indicate that different alleles and/or different genes were  
274 affected in the two nocturnal/diurnal selections. Selections for traits affecting fitness have

275 been shown to have higher selection responses in the direction of lower fitness (19). This may  
276 reflect the original (natural) allele frequency, whereby deleterious traits are mostly  
277 represented by recessive alleles and favourable traits are represented by alleles at high  
278 frequencies (19). This asymmetrical allele frequency could generate non-linear heritability,  
279 such that a slower response to selection (as seen with nocturnal flies) is associated with  
280 increased fitness (19). Indeed, nocturnal females lived longer and produced more progeny  
281 than did diurnal females, an observation that supports a scenario of asymmetric  
282 nocturnal/diurnal allele frequencies.

283         To what extent is the circadian clock involved in diurnal preference? We observed  
284 that (i) PER cycling in the lateral neuron was significantly shifted in nocturnal flies, and (ii)  
285 the phase of M and E peaks in DD differed between the strains, as did their free-running  
286 period (particularly in the isogenic strains). On the other hand, our data indicate that a non-  
287 circadian direct effect of light (light masking) played a significant role in diurnal preference,  
288 particularly nocturnality, as nocturnal flies in DD conditions become rather diurnal (Fig. 5).  
289 In rodents, the differential sensitivity of nocturnal and diurnal animals to light masking has  
290 been well documented (35). This phenomenon was observed both in the laboratory and in the  
291 field (36), with light decreasing arousal in nocturnal animals and the opposite effect occurring  
292 in diurnal animals. Light masking in flies appears to have a greater impact, as it drives flies to  
293 nocturnality.

294         As for the circadian clock, one can ask which part of the circadian system, if any, is  
295 the target of selection (either natural or artificial) that shapes diurnal preference? Potentially,  
296 the clock itself or the input (light) or output pathways (or a combination of these components)  
297 could be targetted. Available evidence alludes to the latter being the case. First, the selection  
298 lines generated here showed similar circadian periods and phases. In the isogenic strains (i.e.,  
299 the N\* and D\* lines), however, there was a noticeable difference in the FRP, with a longer

300 period being seen in nocturnal flies. Indeed, long and short periods are expected to drive the  
301 late and early chronotypes, respectively (37). The behavioural differences between the strains  
302 were accompanied by 2-4 h changes in the phase of nuclear PER in the LNV (of note is the  
303 fact that the sLNV receives light information from the eyes (38)). Most importantly, a  
304 comparison of gene expression between diurnal and nocturnal flies highlighted just a single  
305 core clock gene (*pdf1*). This finding is reminiscent of the results of our previous study in  
306 flies (39), where transcriptional differences between the early and late chronotypes were  
307 present in genes up- and downstream of the clock but not in the clock itself. The phase  
308 conservation of core clock genes in diurnal and nocturnal animals has also been documented  
309 in mammals (40-42). We thus suggest that selection for diurnal preference mainly targets  
310 downstream genes, thereby allowing for phase changes in specific pathways, as changes in  
311 core clock genes would have led to an overall phase change.

312         The main candidates responsible for diurnal preference that emerged from the current  
313 study were output genes, such as *pdf* (and its receptor *Pdfr*) and *to*, as well as genes involved  
314 in photoreception, such as *Rh3*, *TotA*, *TotC* (up-regulated in D\* flies) and *Rh2* and *Pdh* (up-  
315 regulated in N\*). Genes such as *misshapen* (*msn*) and *cry* were implicated by  
316 complementation tests. RH3 absorb UV light ( $\lambda_{max}$ , 347 nm) and is the rhodopsin expressed  
317 in rhabdome 7 (R7) flies (43, 44), while RH2 ( $\lambda_{max}$ , 420 nm) is characteristic of the ocelli  
318 (44, 45) and *pdh* is involved in chromophore metabolism (46).

319         The transcriptional differences between nocturnal and diurnal flies that we identified  
320 are likely to be mediated by genetic variations in these genes or their transcriptional  
321 regulators. Our current effort is to identify these genetic variations which underlie the  
322 genetics of temporal niche preference. For this, the nocturnal and diurnal selection strains  
323 generated here will be an indispensable resource.

324

325

## 326 **Materials and Methods**

327 SI Appendix has extended experimental details

### 328 *Artificial Selection*

329 To generate a highly genetically variable *Drosophila melanogaster* population, we pooled 5  
330 fertilized females (4-5 days old) from 272 isofemale lines from 33 regions in Europe and  
331 Africa (SI Appendix, Table S3) in the same culture bottle containing standard sugar food.  
332 This population was maintained at 25°C in a 12:12 LD cycle. The progeny of this population  
333 was used in the artificial selection as generation 0 (C<sub>0</sub>; Fig. 1). The locomotor activity of 300  
334 males was recorder over 5 days in a 12:12 LD cycle at 25°C. Using the R library GeneCycle  
335 and a custom-made script, we identified rhythmic flies and calculated their ND ratio (i.e., the  
336 ratio between the amount of activity recorded during the night and during the day). For the  
337 first cycle of selection, we selected 25 males with the most extreme nocturnal or diurnal ND  
338 ratios, and crossed them with their (unselected) virgin sisters. The 10 following generations  
339 underwent the same selection procedure. In addition, three control groups (CA, CB, CC)  
340 were generated from the original population (C<sub>0</sub>) by collecting 25 fertilized females in 3 new  
341 bottles. At each selection cycle, the controls underwent the same bottleneck as did the  
342 nocturnal (N) and diurnal (D) populations but without any selective pressure. During and  
343 following selection, the flies were maintained at 25°C in a 12:12 LD cycle.

344 Realize heritability was calculated for both the N and D populations from the  
345 regression of the cumulative response to selection (as a difference from the original  
346 population C<sub>0</sub>), with the cumulative selection differential being based on the data from the 10  
347 cycles of selection (Fig. 1B) (47). Statistical differences between cycles of selection or  
348 between lines were calculated using the Kolmogorov-Smirnov test (KS-test) and the Kruskal-  
349 Wallis rank sum test.

350 To calculate the correlation between the ND ratios of parents and offspring, we  
351 phenotyped 130 virgin males and 130 virgin females from the original population ( $C_0$ ) as  
352 described above and randomly crossed them. We calculated ND ratios of the progeny of each  
353 cross of a male and a virgin female and correlated this value with parental ND ratios.

354

### 355 ***Immunocytochemistry (ICC)***

356 ICC was used to analyse the expression of PER and PDF in the fly brain. For quantification  
357 of PDF levels, we used mouse monoclonal anti-PDF and polyclonal rabbit anti-PER  
358 antibodies (48, 49). The protocol used for whole-brain staining was previously described (50,  
359 51).

360

### 361 ***RNAseq***

362 Gene expression was measured in head samples of flies collected at light-on (ZT0) and light-  
363 off (ZT12) times. Flies (3-4 days old) were entrained for 3 days in 12:12 LD cycle at 25°C at  
364 which point male heads were collected in liquid nitrogen at ZT0 and 12. RNA was extracted  
365 using a Maxwell 16 MDx Research Instrument (Promega), combined with the Maxwell 16  
366 Tissue Total RNA purification kit (AS1220, Promega). RNAseq library preparation and  
367 sequencing was carried by Glasgow Polyomics using an IlluminaNextseq500 platform. Two  
368 independent libraries (single-end) were generated per time point per line. The data were then  
369 processed using Trimmomatic (version 0.32) (52) to remove adapters. The libraries were  
370 quality checked using fastQC (version 0.11.2) (53). The total sequence obtained for each  
371 library ranged from 9.7 Mbp to 21 Mbp, with a “per base quality score” > 30 phred and a  
372 “mean per sequence quality score” > 33 phred. The RNA-seq was aligned to the *Drosophila*  
373 *melanogaster* transcriptome (NCBI\_build5.41) downloaded from the Illumina iGenome  
374 website.

375

376

377 **Figure legends**

378 **Fig. 1. Responses to artificial selection of Nocturnal/Diurnal locomotor activity. A.**

379 Distribution of ND ratios of males of the starting population ( $C_0$ ,  $n=176$ ). The insets show  
380 actogram examples of diurnal (top) and nocturnal flies (bottom). Grey and yellow shading  
381 represent night and day, respectively. **B.** Males average ND ratios of the selected populations  
382 per selection cycle. The black solid line represents nocturnal selection, while the dashed line  
383 represents diurnal selection. Data points correspond to average ND ratios  $\pm$  standard  
384 deviation ( $n=104-316$ ). The ND ratio of the original population is shown in  $C_0$ . **C.**  
385 Correlation between mid-parents ( $n = 105$ ) and mid-progenies ( $n =105$ ). Correlation  
386 coefficients and p values are reported below the regression equation. **D.** Correlation between  
387 mothers ( $n =85$ ) and daughters ( $n =85$ ).

388

389 **Fig. 2. Correlated responses of fitness traits to selection. A.** Survival curves of flies of the

390 three selection populations ( $n=36-40$ ; N: black, D: red, C: blue). The proportion of surviving  
391 flies (y axes) is plotted against the number of days (x axes). **B.** Number of progeny produced  
392 per female for N, C and D crosses. Grey and white bars indicate the number of males and  
393 females, respectively (average  $\pm$  standard error). Development time (egg-to-adult)  
394 distributions are shown for male progeny (**C**) and females (**D**). Proportion (%) of progeny  
395 produced per female per day. Males: N ( $n=3556$ ), D ( $n=2308$ ) and C ( $n=2998$ ). Females: N  
396 ( $n=3748$ ), D ( $n=2401$ ) and C ( $n=3145$ ).

397

398 **Fig. 3. Circadian behaviour of nocturnal and diurnal selection flies. A.** Boxplots of

399 circadian periods under free-run conditions. The horizontal line in each box represents the



400 median value, the bottom and upper ends of the box correspond to the upper and lower  
401 quartiles, respectively and the whiskers denote maximum and minimum values, excluding  
402 outliers. Statistical differences were tested by a TukeyHSD test, with \* signifying  $p < 0.05$ .  
403 The FRP was longer in the C line ( $n=80$ ) than in the D line ( $n=159$ ), while the difference  
404 between the D and N lines ( $n=240$ ) was only marginally significant (TukeyHSD test,  
405  $p=0.06$ ). The FRP of N and C flies was similar ( $p=0.45$ ). **B.** Acrophase angles of the free-run  
406 activity for N (black circles,  $n=255$ ), D (red circles,  $n=159$ ) and C (blue triangles,  $n=65$ )  
407 populations. The free-run phases of the three populations did not differ ( $F_{2,476}:1.91$ ,  $p=0.149$ ,  
408 NS). Lines represent mean vectors  $\pm$  95% confidence interval (CI). One hour corresponds to  
409 an angle of  $15^\circ$ . **C.** Phase delay angles are shown for N (black circles,  $n=153$ ), D (red circles,  
410  $n=155$ ) and C (blue triangles,  $n=56$ ) populations. Differences are not significant ( $F_{2,361}=1.47$ ,  
411  $p=0.23$ , NS). Lines represent mean vectors  $\pm$  95% CI.

412

413 **Fig. 4. Circadian behaviour of isogenic strains (N\*, D\* and C\*).** **A.** Boxplots of free-  
414 running periods of the N\* ( $n=64$ ), C\* ( $n=124$ ) and D\* ( $n=157$ ) isogenic lines. Solid lines  
415 represent median periods, the bottom and upper ends of the box correspond to the upper and  
416 lower quartiles, respectively and the whiskers denote maximum and minimum values,  
417 excluding outliers. TukeyHSD test, \* $p<0.05$ , \*\* $p<0.001$  **B.** Acrophase angles of the free-  
418 running activity shown for the N\* (black circles,  $n=64$ ), D\* (red circles,  $n=157$ ) and C\* (blue  
419 triangles,  $n=124$ ) isogenic lines. The phase in the N\* line was delayed by 2.02 h, as compared  
420 to what was measured in the D\* line, and by 1.38 h, as compared to what was measured in  
421 the C\* line ( $F_{2,342}:6.01$ ,  $p<0.01$ ). Lines represent mean vectors  $\pm$  95% CI. One hour  
422 corresponds to a  $15^\circ$  angle. **C.** Phase of eclosion in the N\* (black circle,  $n=75$ ), D\* (red  
423 circle,  $n=111$ ) and C\* (blue triangle,  $n=50$ ) lines. The eclosion phase of D\* flies was delayed  
424 by  $\sim 2$  h, as compared to what was measured with both the N\* and C\* lines ( $F_{2,233}:4.95$ ,

425  $p < 0.01$ ). There was no difference between N\* and C\* flies ( $F_{1,123}:0.08$ ,  $p = 0.78$ , NS). Lines  
426 represent mean vectors  $\pm$  95% CI. One hour corresponds to an angle of  $15^\circ$ . Light-on (ZT0)  
427 and light-off (ZT12) translated to  $0^\circ$  and  $180^\circ$  angles, respectively. **D.** Phase delays of N\*  
428 (black circles,  $n = 66$ ), D\* (red circles,  $n=170$ ) and C\* (blue triangles,  $n=126$ ) flies. There  
429 was no difference between the strains ( $F_{2,359}:1.93$ ,  $p = 0.15$ , NS). Lines represent mean  
430 vectors  $\pm$  95% CI.

431

432 **Fig. 5. Light masking of locomotor behaviour.** A. Double plots of the median locomotor  
433 activity ( $\pm$  SEM) per 30 min bin at 3 days in a 12:12 LD cycle followed by 4 days in DD.  
434 (N\*, black,  $n=71$ ; D\*, red,  $n=130$ ; C\*, Blue,  $n = 110$ ). Shades indicate light-off. Yellow  
435 dashed lines delineate subjective nights. The overall ANOVA between 4 days in LD and 4  
436 days in DD (starting from the second day in DD) indicates a significant effect of the light  
437 regime (i.e., LD vs. DD;  $F_{1,594} = 105.03$ ,  $p < 0.0001$ ) and genotype ( $F_{2,594}:173.01$ ,  $p < 0.0001$ ).  
438 The interaction genotype  $\times$  environment was also significant ( $F_{2,594}:102.66$ ,  $p < 0.0001$ ). Post-  
439 hoc analysis (TukeyHSD test) revealed that both N\* and C\* flies became significantly more  
440 “diurnal” when released in constant conditions (N\*  $p < 0.0001$ ; C\*  $p < 0.001$ ). The ND ratios of  
441 D\* flies did not significantly change in DD ( $p=0.94$ , NS).

442

443 **Fig. 6. Expression of PER in clock neurons.** Quantification of nuclear PER staining in N\*  
444 (full lines) and D\*(dashed lines) flies maintained in LD. Shaded area represents dark.  
445 Representative staining (composite, Z-stacks) is shown below each panel. Points represent  
446 averages  $\pm$  standard error. The peak of PER signals in ventral neurons (LNv: 5th-sLNv,  
447 sLNv, ILNv) was delayed in N\* flies, as compared to D\* flies (ZT1 vs ZT21-23), as  
448 indicated by significant time  $\times$  genotype interactions: 5th-sLNv  $\chi^2=12141$ ,  $df=11$ ,  $p < 0.0001$ ;  
449 sLNv  $\chi^2=4779.4$ ,  $df=11$ ,  $p < 0.0001$ ; ILNv  $\chi^2=7858$ ,  $df=11$ ,  $p < 0.0001$ . The N\* PER signal is

450 stronger in sLNv ( $\chi^2=2416.6$ ,  $df=1$ ,  $p<0.0001$ ), LNd ( $\chi^2=3924$ ,  $df=1$ ,  $p<0.0001$ ) and DN1  
451 ( $\chi^2=1799$ ,  $df=1$ ,  $p<0.0001$ ) and weaker in DN2 ( $\chi^2=523.2$ ,  $df=1$ ,  $p<0.05$ ).

452

453 **Fig. 7. Expression of PDF in LNv projections.** PDF staining in the N\* (full lines) and D\*  
454 (dashed lines) lines maintained in a 12:12 LD cycle. Shading represents light-off.  
455 Representative staining is shown in Supplementary Fig. S4. Points represent averages  $\pm$   
456 standard error. The N\* signal was lower than the D\* signal at ZT3 ( $F_{1,18}=11.99$ ,  $p<0.01$ ) and  
457 ZT7 ( $F_{1,19}=10.13$ ,  $p<0.01$ ), and higher at ZT11 ( $F_{1,15}=10.53$ ,  $p<0.01$ ) and ZT13 ( $F_{1,17}=23.39$ ,  
458  $p<0.001$ ).

459

460 **Fig. 8. Functional annotation of DEGs associated with diurnal preference.** Pie charts  
461 representing significant terms of DEGs in 3 pairwise contrasts (D\* vs N\*, D\* vs C\*, N\* vs  
462 C\*) at ZT0 and ZT12. Sections represent the percent of enrichment for each term.  $p<0.05$   
463 after Benjamini correction with the exception of the “signal peptide” term at ZT0, where  $p =$   
464 0.054.

465

466 **Fig. 9. Quantitative complementation tests.** Testing whether N\*, D\* and C\* alleles vary in  
467 terms of their ability to complement the phenotype caused by the *Pdf* and *Pdfr* mutant alleles.  
468 Average ND ratio  $\pm$  standard deviation of *Pdf*<sup>01</sup> heterozygotes (left) and of *Pdfr* using p-  
469 element insertions *Pdfr*<sup>5304</sup> (middle) and *Pdfr*<sup>3369</sup> (right). Numbers of tested flies are reported  
470 in each chart bar. \* represents  $p < 0.05$ .

471

472 **Data Availability**

473 The RNASeq sequencing files are available at the Gene Expression Omnibus (GEO)  
474 accession GSE116985 (use reviewer token: ibspysiwzvafhef).

475

476 **References**

- 477 1. Hut RA, Kronfeld-Schor N, van der Vinne V & De la Iglesia H (2012) In search of a  
478 temporal niche: Environmental factors. *Prog Brain Res* 199: 281-304.
- 479 2. Heesy CP & Hall MI (2010) The nocturnal bottleneck and the evolution of mammalian  
480 vision. *Brain Behav Evol* 75(3): 195-203.
- 481 3. Daan S (1981) in *Biological Rhythms*, ed Aschoff J (Springer US, New York), pp 275-298.
- 482 4. Jacobs GH (2009) Evolution of colour vision in mammals. *Philosophical Transactions of*  
483 *the Royal Society B* 364: 2957-2967.
- 484 5. Levy O, Dayan T & Kronfeld-Schor N (2007) The relationship between the golden spiny  
485 mouse circadian system and its diurnal activity: An experimental field enclosures and  
486 laboratory study. *Chronobiol Int* 24(4): 599-613.
- 487 6. Watson NF, Buchwald D & Harden KP (2013) A twin study of genetic influences on  
488 diurnal preference and risk for alcohol use outcomes. *J Clin Sleep Med* 9(12): 1333-1339.
- 489 7. Archer SN, *et al* (2010) Polymorphism in the PER3 promoter associates with diurnal  
490 preference and delayed sleep phase disorder. *Sleep* 33(5): 695-701.

- 491 8. Yoshii T, Rieger D & Helfrich-Forster C (2012) Two clocks in the brain: An update of the  
492 morning and evening oscillator model in *Drosophila*. *Prog Brain Res* 199: 59-82.
- 493 9. Rieger D, *et al* (2007) The fruit fly *Drosophila melanogaster* favors dim light and times its  
494 activity peaks to early dawn and late dusk. *J Biol Rhythms* 22(5): 387-399.
- 495 10. Kempinger L, Dittmann R, Rieger D & Helfrich-Forster C (2009) The nocturnal activity  
496 of fruit flies exposed to artificial moonlight is partly caused by direct light effects on the  
497 activity level that bypass the endogenous clock. *Chronobiol Int* 26(2): 151-166.
- 498 11. Bachleitner W, Kempinger L, Wulbeck C, Rieger D & Helfrich-Forster C (2007)  
499 Moonlight shifts the endogenous clock of *Drosophila melanogaster*. *Proc Natl Acad Sci U S*  
500 *A* 104(9): 3538-3543.
- 501 12. Fujii S, Krishnan P, Hardin P & Amrein H (2007) Nocturnal male sex drive in  
502 *Drosophila*. *Curr Biol* 17(3): 244-251.
- 503 13. Tauber E, Roe H, Costa R, Hennessy JM & Kyriacou CP (2003) Temporal mating  
504 isolation driven by a behavioral gene in *Drosophila*. *Curr Biol* 13(2): 140-5.
- 505 14. Kumar S, Vaze KM, Kumar D & Sharma VK (2006) Selection for early and late adult  
506 emergence alters the rate of pre-adult development in *Drosophila melanogaster*. *BMC Dev*  
507 *Biol* 6: 57.
- 508 15. Pegoraro M, *et al* (2014) Molecular evolution of a pervasive natural amino-acid  
509 substitution in *Drosophila cryptochrome*. *PLoS One* 9(1): e86483.

- 510 16. Allada R, White NE, So WV, Hall JC & Rosbash M (1998) A mutant *Drosophila*  
511 homolog of mammalian *clock* disrupts circadian rhythms and transcription of *period* and  
512 *timeless*. *Cell* 93(5): 791-804.
- 513 17. Kumar S, Chen D & Sehgal A (2012) Dopamine acts through cryptochrome to promote  
514 acute arousal in *Drosophila*. *Genes Dev* 26(11): 1224-1234.
- 515 18. Kim EY, *et al* (2002) *Drosophila* CLOCK protein is under posttranscriptional control and  
516 influences light-induced activity. *Neuron* 34(1): 69-81.
- 517 19. Frankham R (1990) Are responses to artificial selection for reproductive fitness  
518 characters consistently asymmetrical?. *Genetic Research, Cambridge* 56: 35-42.
- 519 20. Myers EM, Yu J & Sehgal A (2003) Circadian control of eclosion: Interaction between a  
520 central and peripheral clock in *Drosophila melanogaster*. *Current Biology* 13(6): 526-33.
- 521 21. Qiu J & Hardin PE (1996) Developmental state and the circadian clock interact to  
522 influence the timing of eclosion in *Drosophila melanogaster*. *Journal of Biological Rhythms*  
523 11: 75-86.
- 524 22. Huang da W, Sherman BT & Lempicki RA (2009) Bioinformatics enrichment tools:  
525 Paths toward the comprehensive functional analysis of large gene lists. *Nucleic Acids Res*  
526 37(1): 1-13.
- 527 23. Huang da W, Sherman BT & Lempicki RA (2009) Systematic and integrative analysis of  
528 large gene lists using DAVID bioinformatics resources. *Nat Protoc* 4(1): 44-57.

- 529 24. Long AD, Mullaney SL, Mackay TF & Langley CH (1996) Genetic interactions between  
530 naturally occurring alleles at quantitative trait loci and mutant alleles at candidate loci  
531 affecting bristle number in *Drosophila melanogaster*. *Genetics* 144(4): 1497-1510.
- 532 25. Tataroglu O & Emery P (2015) The molecular ticks of the *Drosophila* circadian clock.  
533 *Curr Opin Insect Sci* 7: 51-57.
- 534 26. Zhang L, *et al* (2010) DN1(p) circadian neurons coordinate acute light and PDF inputs to  
535 produce robust daily behavior in *Drosophila*. *Curr Biol* 20(7): 591-599.
- 536 27. van der Vinne V, *et al* (2014) Cold and hunger induce diurnality in a nocturnal mammal.  
537 *Proc Natl Acad Sci U S A* 111(42): 15256-15260.
- 538 28. van der Vinne V, Gorter JA, Riede SJ & Hut RA (2015) Diurnality as an energy-saving  
539 strategy: Energetic consequences of temporal niche switching in small mammals. *J Exp Biol*  
540 218(Pt 16): 2585-2593.
- 541 29. Peixoto AA & Hall JC (1998) Analysis of temperature-sensitive mutants reveals new  
542 genes involved in the courtship song of *Drosophila*. *Genetics* 148(2): 827-838.
- 543 30. Schutte RJ, *et al* (2014) Knock-in model of dravet syndrome reveals a constitutive and  
544 conditional reduction in sodium current. *J Neurophysiol* 112(4): 903-912.
- 545 31. Fehon RG, Dawson IA & Artavanis-Tsakonas S (1994) A *Drosophila* homologue of  
546 membrane-skeleton protein 4.1 is associated with septate junctions and is encoded by the  
547 *coracle* gene. *Development* 120(3): 545-557.

- 548 32. Lee SJ, Xu H, Kang LW, Amzel LM & Montell C (2003) Light adaptation through  
549 phosphoinositide-regulated translocation of *Drosophila* visual *arrestin*. *Neuron* 39(1): 121-  
550 132.
- 551 33. Houalla T, Hien Vuong D, Ruan W, Suter B & Rao Y (2005) The Ste20-like kinase  
552 misshapen functions together with bicaudal-D and dynein in driving nuclear migration in the  
553 developing *Drosophila* eye. *Mech Dev* 122(1): 97-108.
- 554 34. Ugrankar R, *et al* (2015) *Drosophila* glucone screening identifies Ck1alpha as a  
555 regulator of mammalian glucose metabolism. *Nat Commun* 6: 7102.
- 556 35. Mrosovsky N (1999) Masking: History, definitions, and measurement. *Chronobiol Int*  
557 16(4): 415-429.
- 558 36. Rotics S, Dayan T, Levy O & Kronfeld-Schor N (2011) Light masking in the field: An  
559 experiment with nocturnal and diurnal spiny mice under semi-natural field conditions.  
560 *Chronobiol Int* 28(1): 70-75.
- 561 37. Roenneberg T & Merrow M (2003) The network of time: Understanding the molecular  
562 circadian system. *Curr Biol* 13(5): R198-207.
- 563 38. Schlichting M, *et al* (2016) A neural network underlying circadian entrainment and  
564 photoperiodic adjustment of sleep and activity in *Drosophila*. *J Neurosci* 36(35): 9084-9096.
- 565 39. Pegoraro M, *et al* (2015) Gene expression associated with early and late chronotypes in  
566 *Drosophila melanogaster*. *Frontiers in Neurology* 6: 100.



- 567 40. Ramanathan C, Stowie A, Smale L & Nunez AA (2010) Phase preference for the display  
568 of activity is associated with the phase of extra-suprachiasmatic nucleus oscillators within  
569 and between species. *Neuroscience* 170(3): 758-772.
- 570 41. Vosko AM, Hagenauer MH, Hummer DL & Lee TM (2009) *Period* gene expression in  
571 the diurnal degu (*Octodon degus*) differs from the nocturnal laboratory rat (*Rattus*  
572 *norvegicus*). *Am J Physiol Regul Integr Comp Physiol* 296(2): R353-61.
- 573 42. Otalora BB, Hagenauer MH, Rol MA, Madrid JA & Lee TM (2013) *Period* gene  
574 expression in the brain of a dual-phasing rodent, the *Octodon degus*. *J Biol Rhythms* 28(4):  
575 249-261.
- 576 43. Feiler R, *et al* (1992) Ectopic expression of ultraviolet-rhodopsins in the blue  
577 photoreceptor cells of *Drosophila*: Visual physiology and photochemistry of transgenic  
578 animals. *J Neurosci* 12(10): 3862-3868.
- 579 44. Stavenga DG & Arikawa K (2008) One rhodopsin per photoreceptor: Iro-C genes break  
580 the rule. *PLoS Biol* 6(4): e115.
- 581 45. Feiler R, Harris WA, Kirschfeld K, Wehrhahn C & Zuker CS (1988) Targeted  
582 misexpression of a *Drosophila opsin* gene leads to altered visual function. *Nature* 333(6175):  
583 737-741.
- 584 46. Wang X, Wang T, Jiao Y, von Lintig J & Montell C (2010) Requirement for an  
585 enzymatic visual cycle in *Drosophila*. *Curr Biol* 20(2): 93-102.
- 586 47. Falconer DS & Mackay TFC (1996) *Introduction to Quantitative Genetics*, (Longman,  
587 Harlow).

- 588 48. Stanewsky R, *et al* (1997) Temporal and spatial expression patterns of transgenes  
589 containing increasing amounts of the *Drosophila* clock gene period and a lacZ reporter:  
590 Mapping elements of the PER protein involved in circadian cycling. *J Neurosci* 17(2): 676-  
591 696.
- 592 49. Hermann-Luibl C, Yoshii T, Senthilan PR, Dircksen H & Helfrich-Forster C (2014) The  
593 ion transport peptide is a new functional clock neuropeptide in the fruit fly *Drosophila*  
594 *melanogaster*. *J Neurosci* 34(29): 9522-9536.
- 595 50. Hermann C, Yoshii T, Dusik V & Helfrich-Forster C (2012) Neuropeptide F  
596 immunoreactive clock neurons modify evening locomotor activity and free-running period in  
597 *Drosophila melanogaster*. *J Comp Neurol* 520(5): 970-987.
- 598 51. Hermann C, *et al* (2013) The circadian clock network in the brain of different *Drosophila*  
599 species. *J Comp Neurol* 521(2): 367-388.
- 600 52. Bolger AM, Lohse M & Usadel B (2014) Trimmomatic: A flexible trimmer for illumina  
601 sequence data. *Bioinformatics* 30(15): 2114-2120.
- 602 53. Andrews S (2010) FastQC: A quality control tool for high throughput sequence data.  
603 available online at: [Http://Www.bioinformatics.babraham.ac.uk/projects/fastqc](http://www.bioinformatics.babraham.ac.uk/projects/fastqc)
- 604
- 605

Figure 1

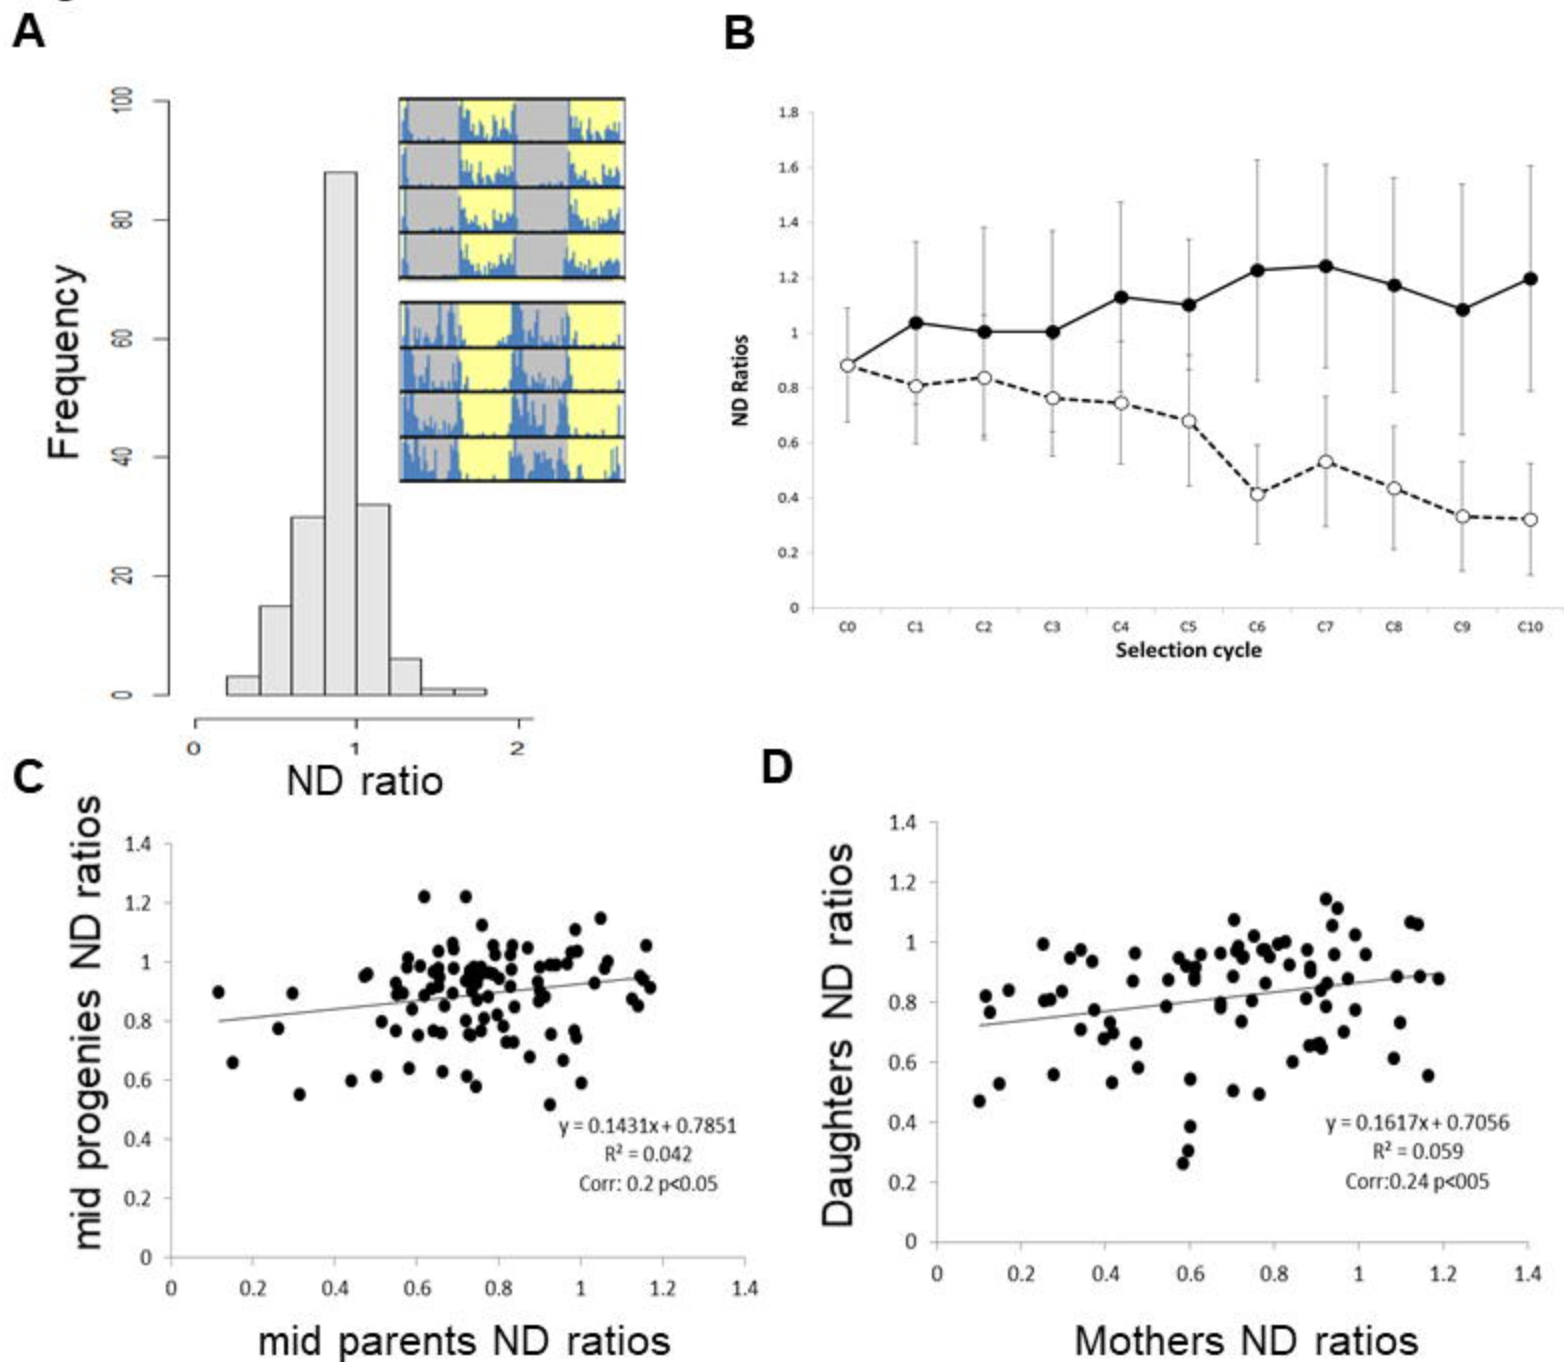

Figure 2

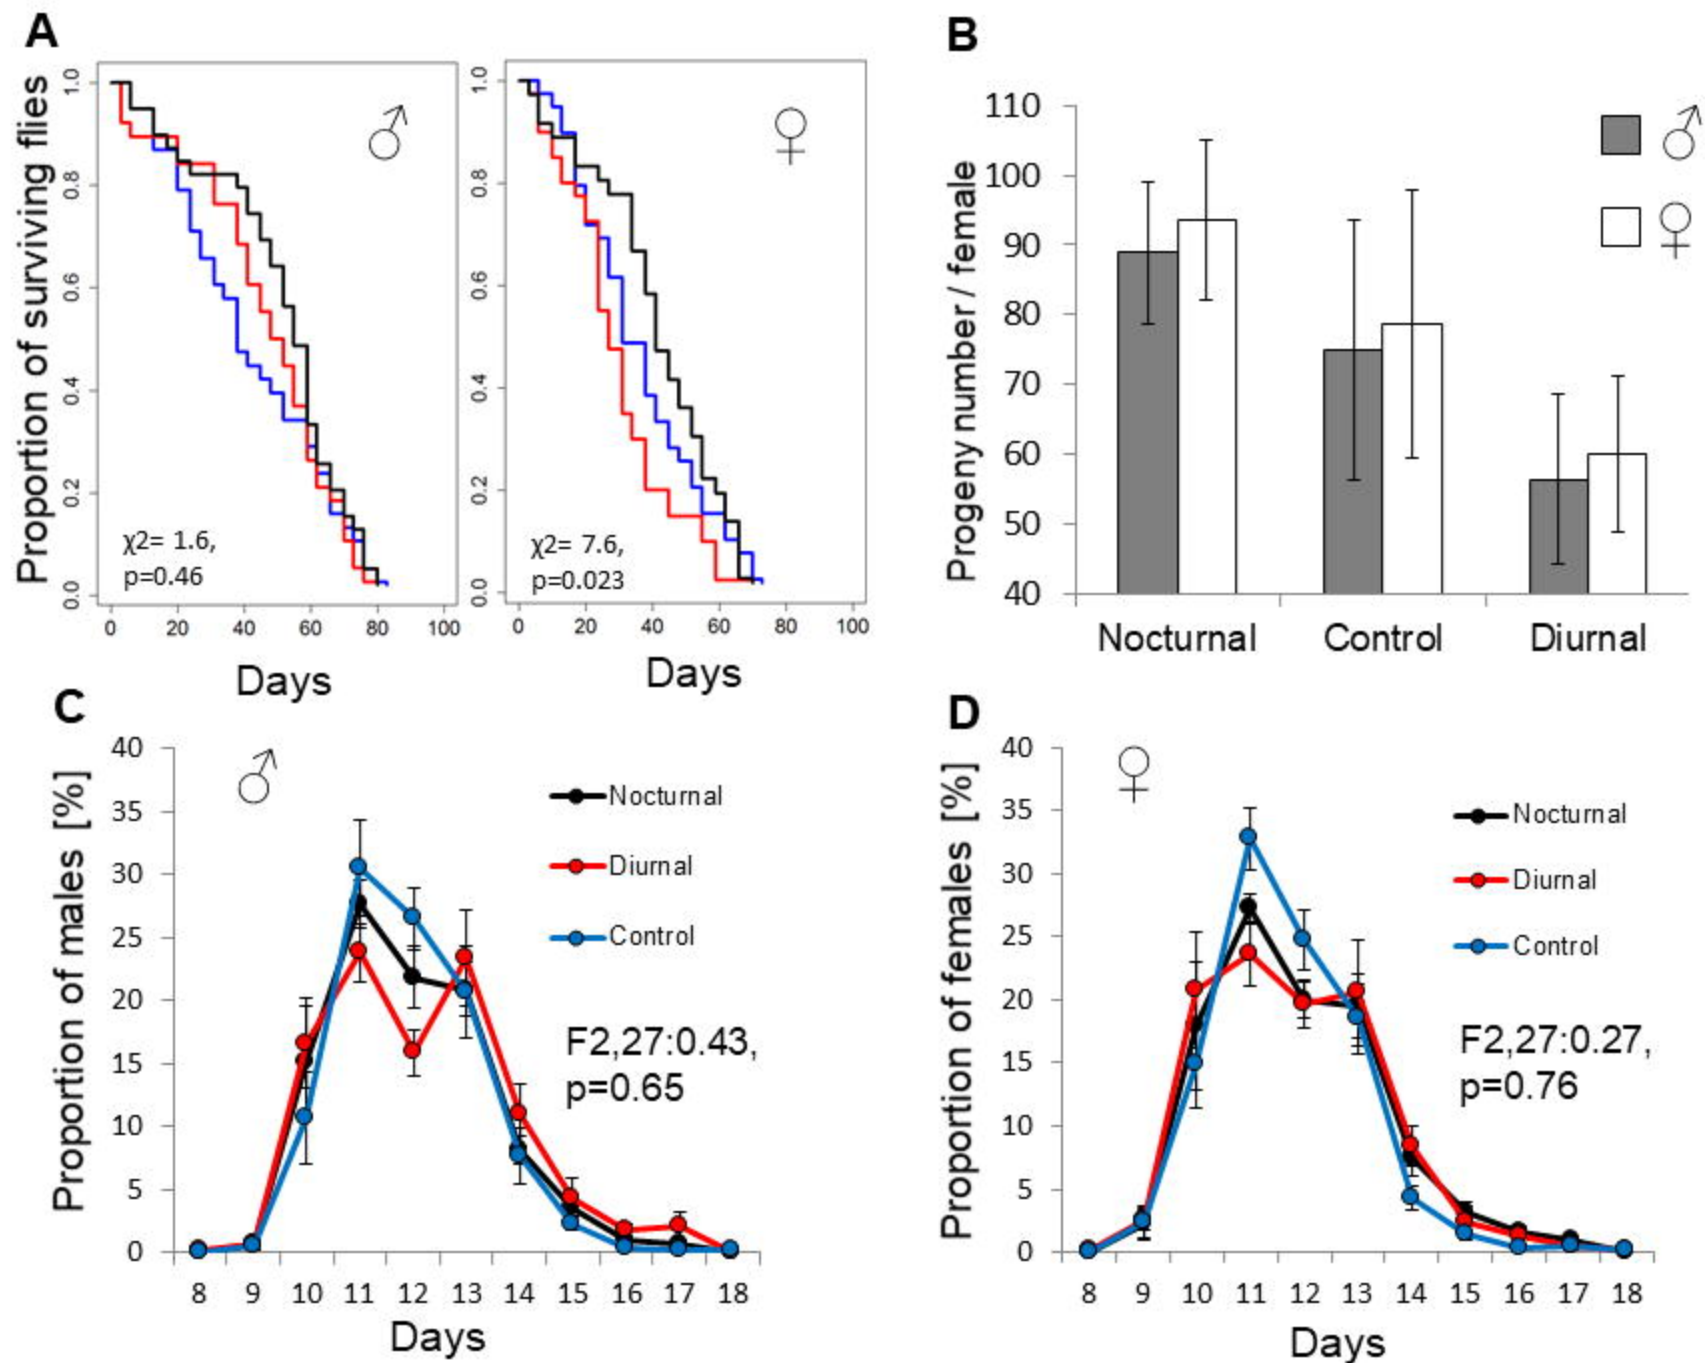

Figure 3

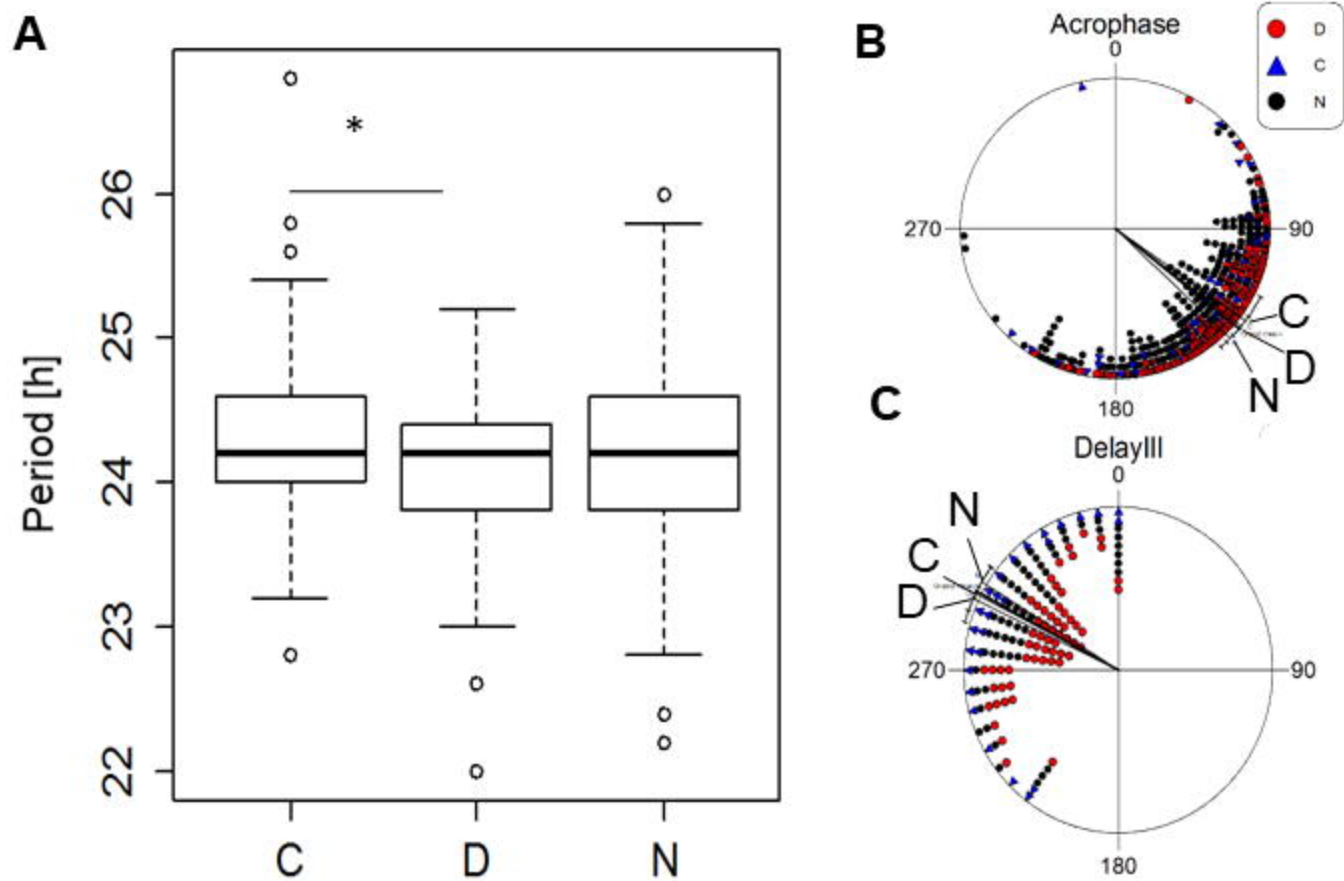

Figure 4

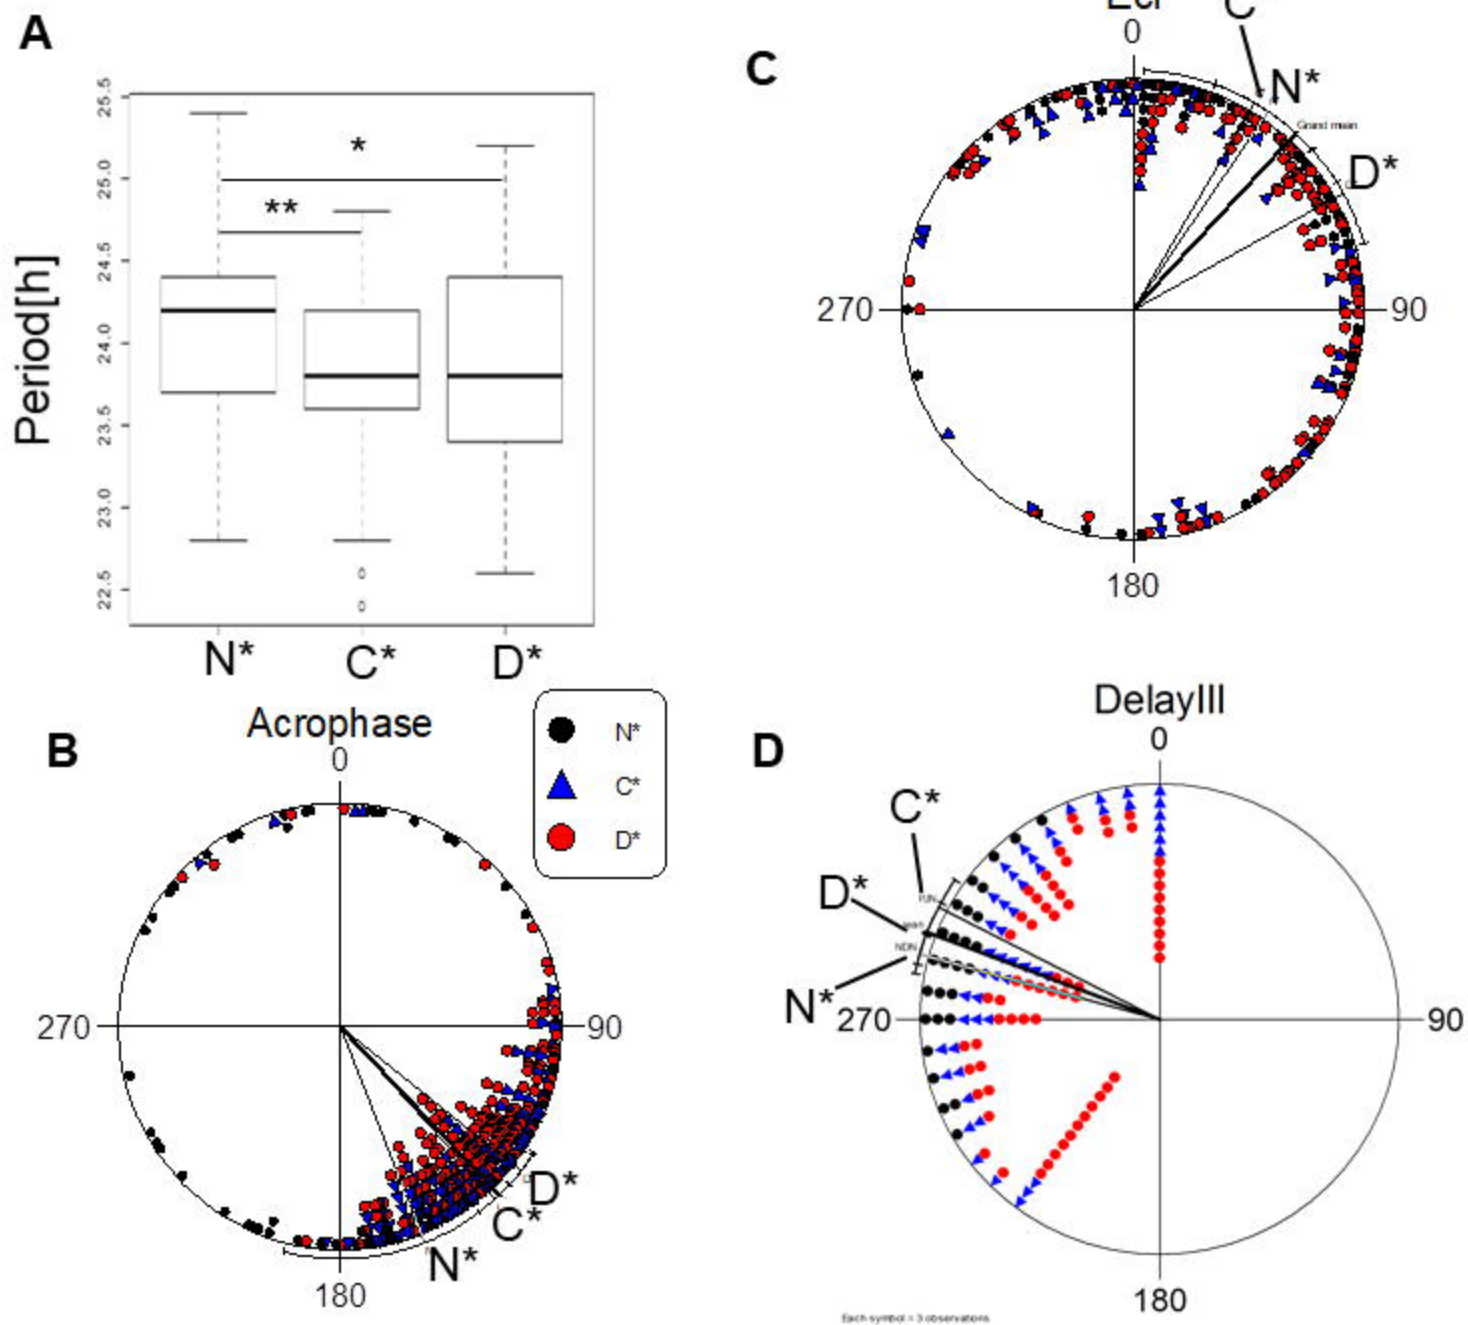

Figure 5

Median locomotor activity/30 min bins

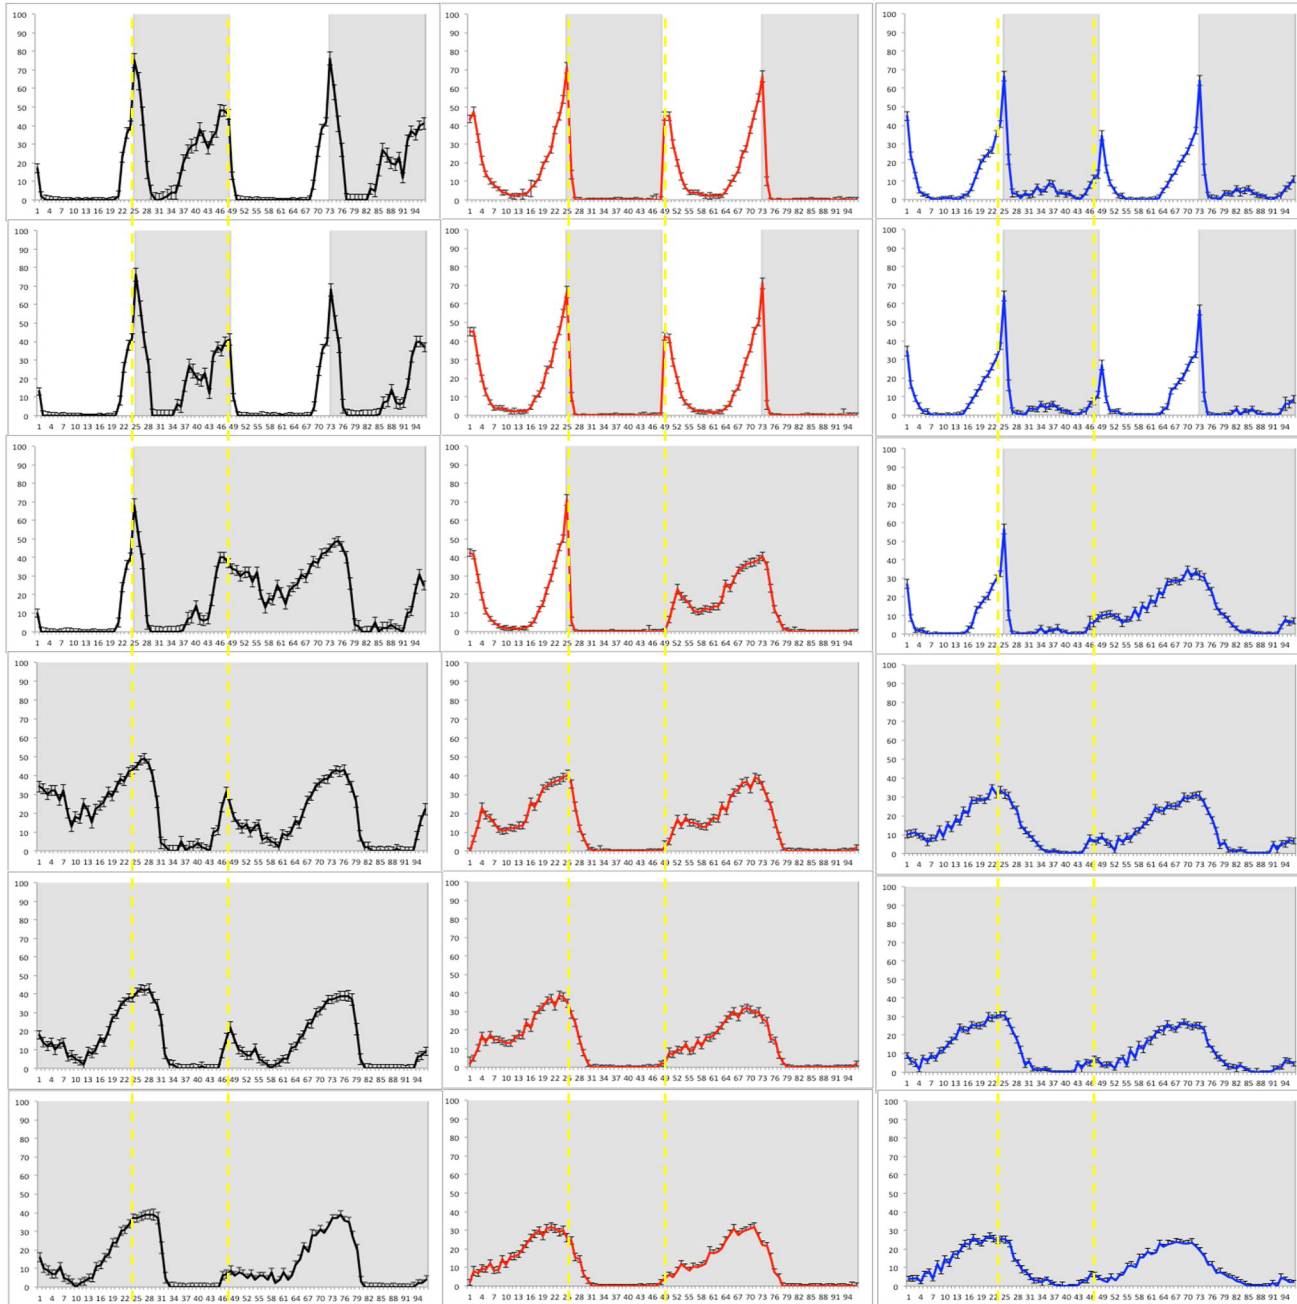

Time

Figure 6

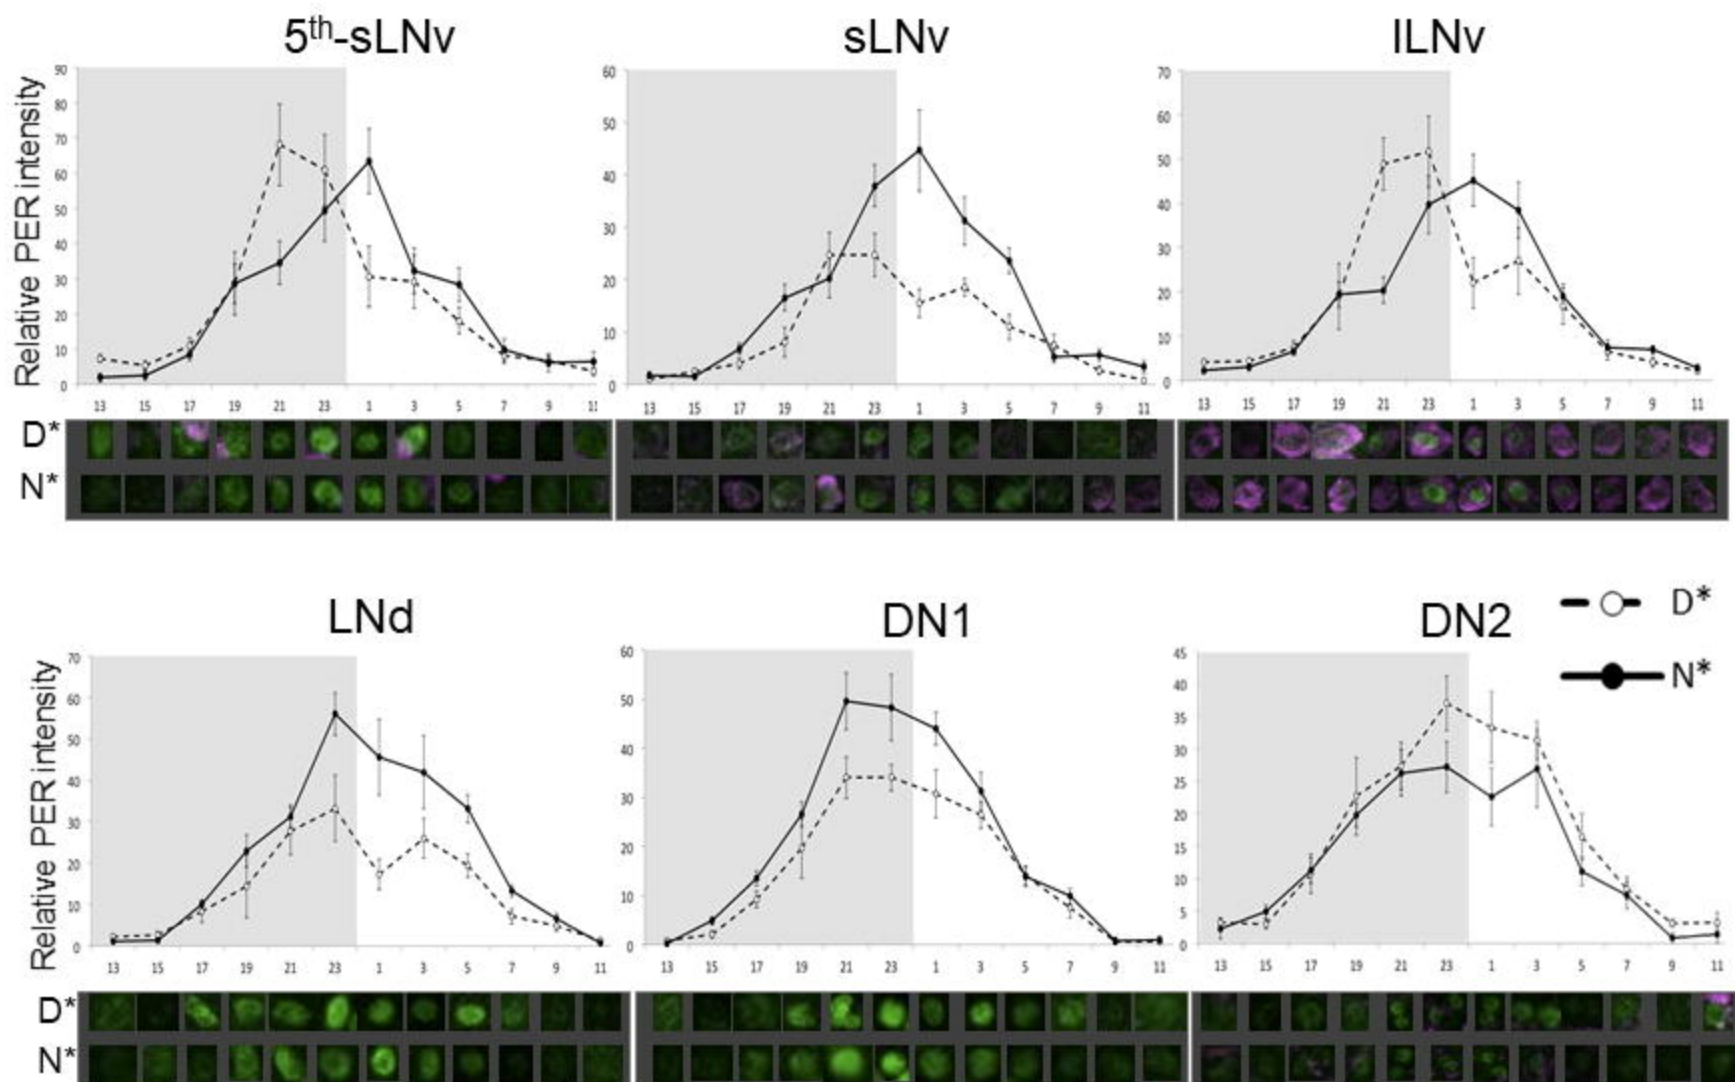



Figure 7

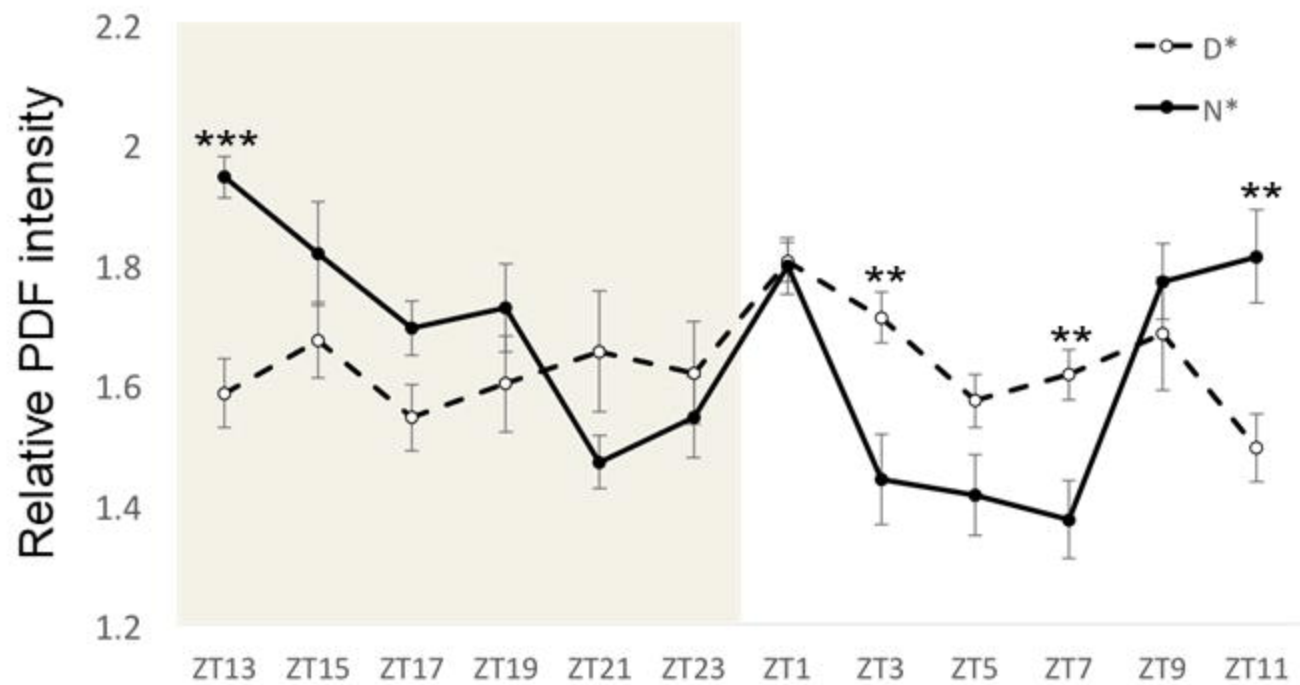

Figure 8

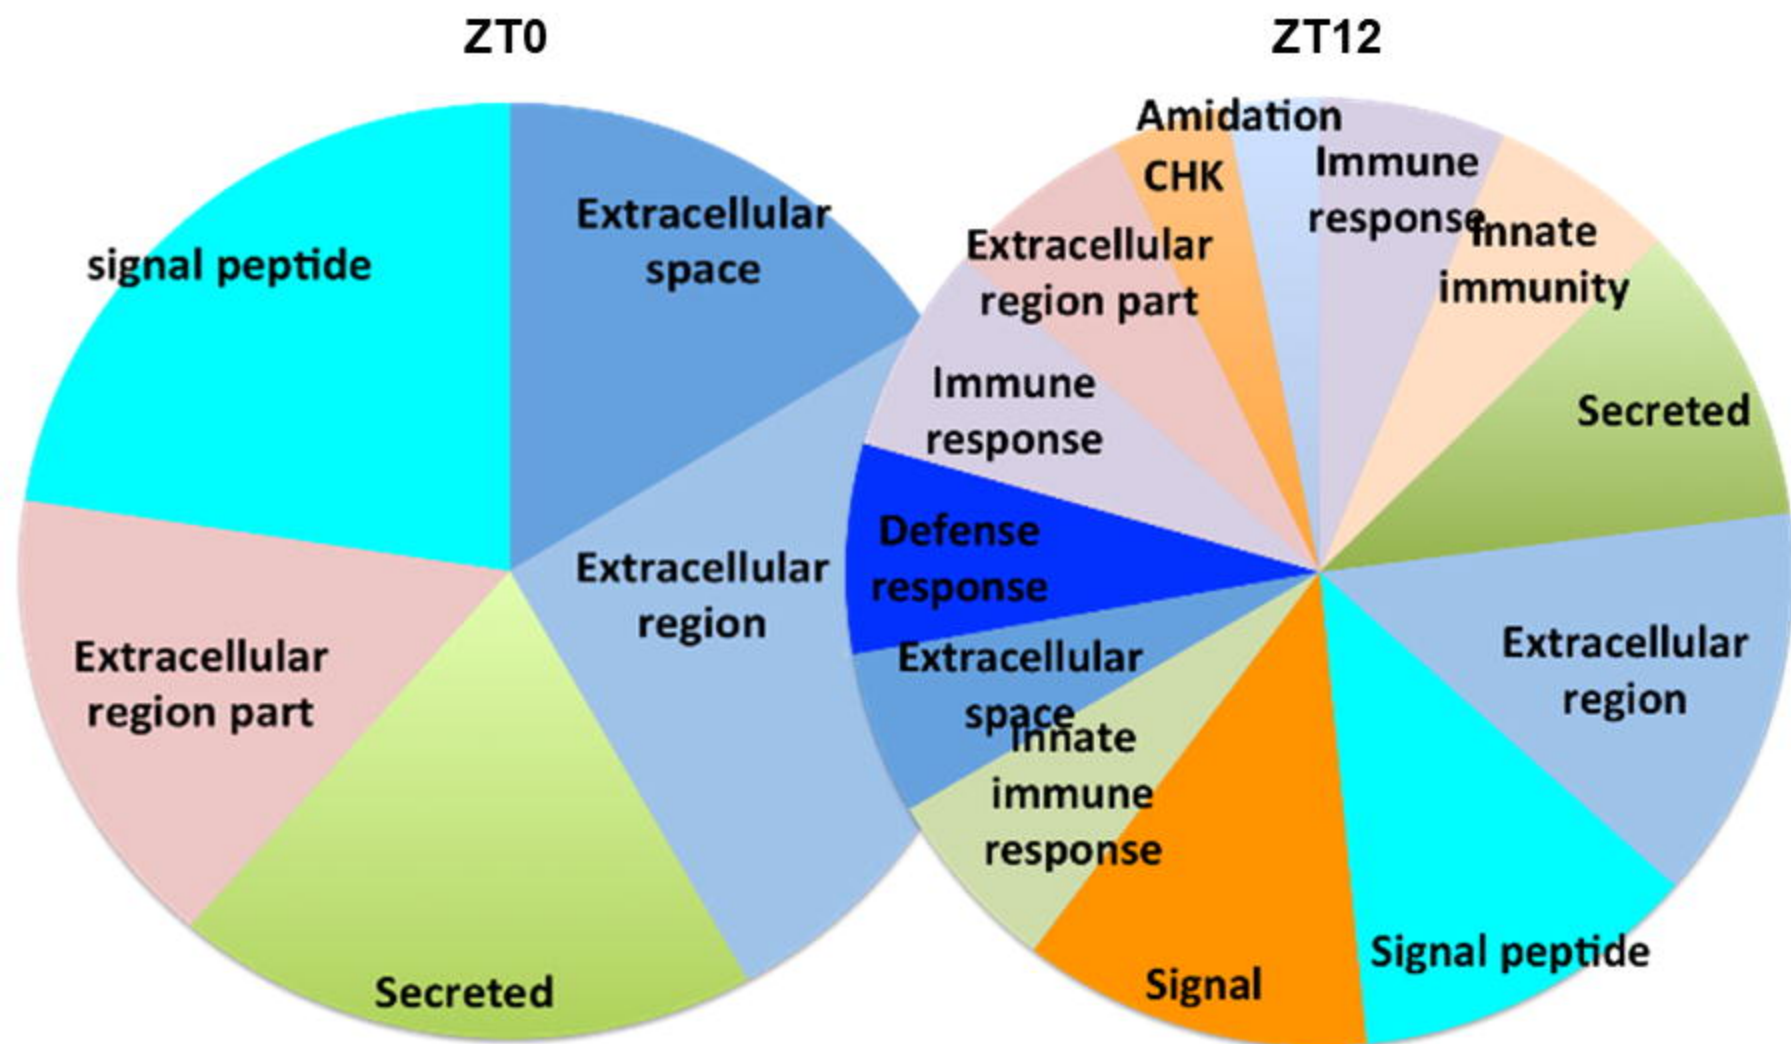

Figure 9

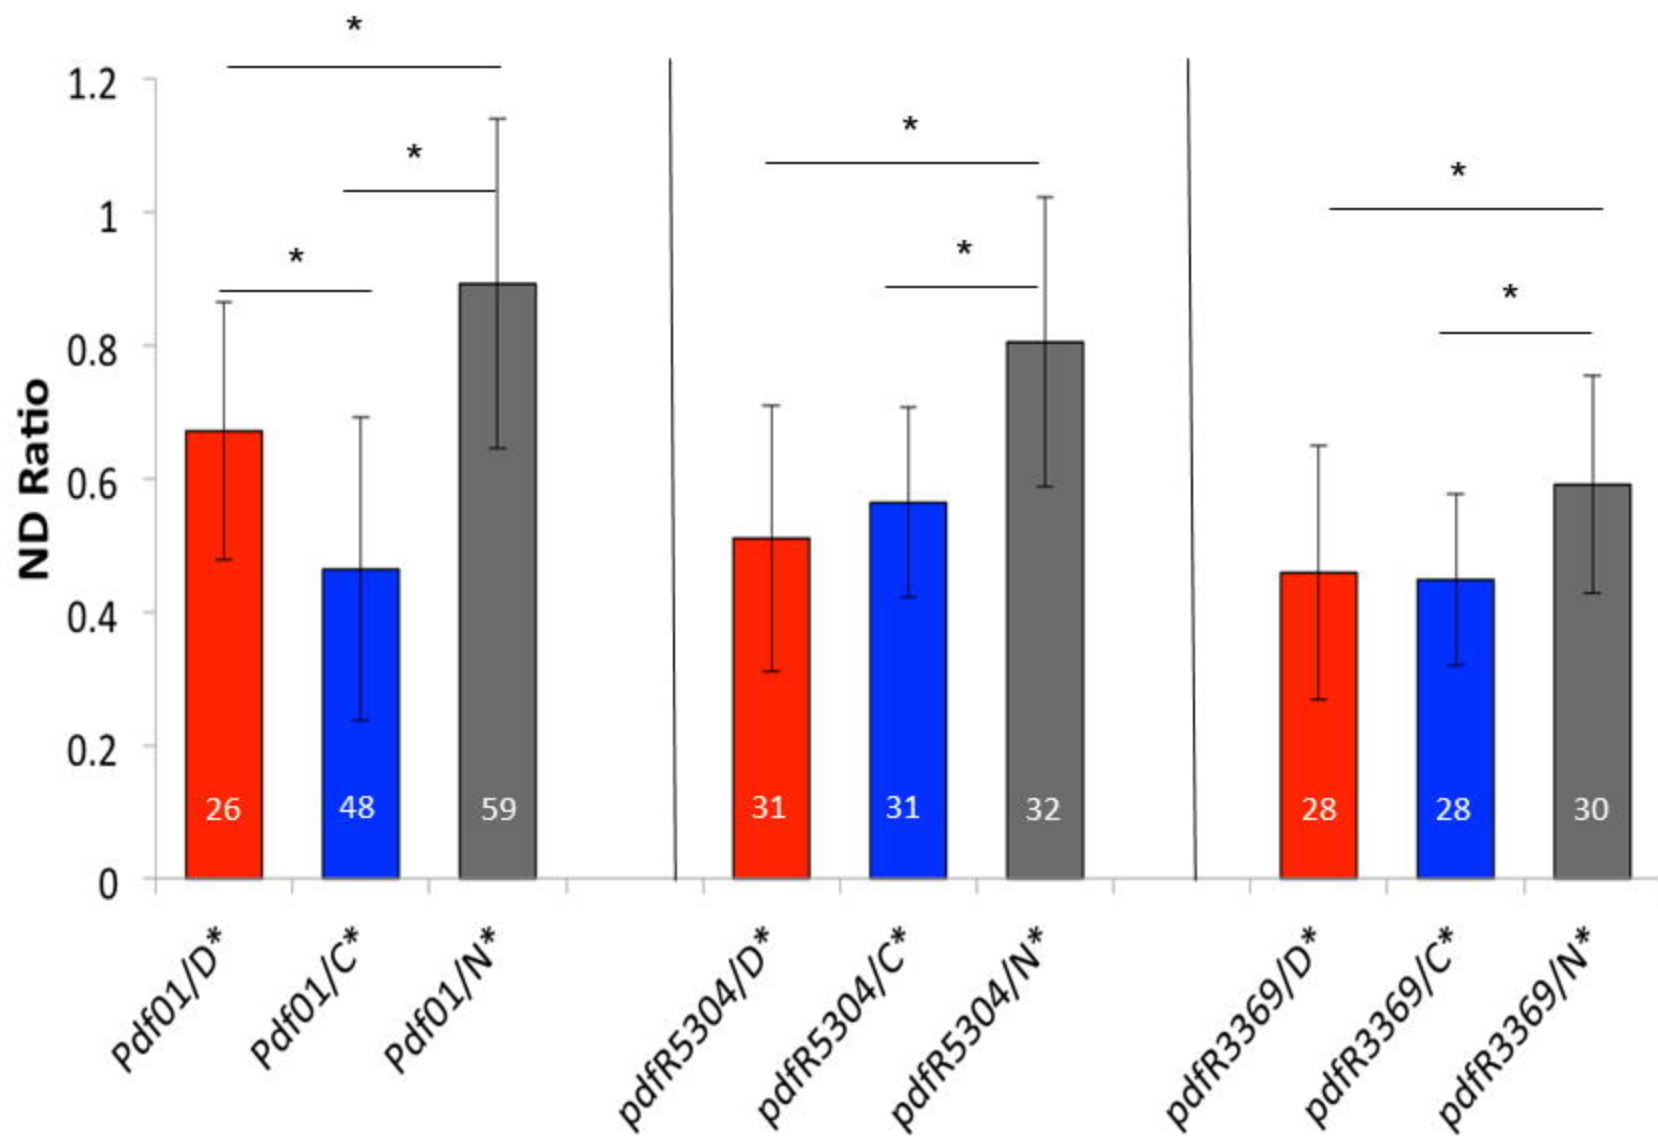

Source: https://www.biorxiv.org/content/10.1101/380733v1.full.pdf
